# Supplementary material for: Respiratory Burst Oxidase Homolog D as a Modulating Component of Oxidative Response under Ammonium Toxicity
Source: MDPI journal article supplement (doi:10.3390/antiox11040703), 2022-04-02
Supplement: s1 [file s1]

**Table S1.** Primer sequences used for RT-qPCR assays.

| Gene         | AGI identification | Primer sequence/reference     |                           |
|--------------|--------------------|-------------------------------|---------------------------|
| <b>AIR12</b> | AT3G07390          | LP: TACCTCTTATCAAACACCAACCACA | RP: AGCGAGACGAAACAAGCAACG |
| <b>FER</b>   | AT3G51550          | Podgórska et al. 2017 [55]    |                           |
| <b>GR1</b>   | AT3G24170          | Podgórska et al. 2018a [50]   |                           |
| <b>GR2</b>   | AT3G54660          | Podgórska et al. 2018a [50]   |                           |
| <b>MPK3</b>  | AT3G45640          | Podgórska et al. 2017 [S_1]   |                           |
| <b>OZF1</b>  | AT2G19810          | Podgórska et al. 2018b [12]   |                           |
| <b>PP2A</b>  | AT1G13320          | Czechowski et al. 2005 [51]   |                           |
| <b>POX33</b> | AT3G49110          | Podgórska et al. 2018b [12]   |                           |
| <b>POX34</b> | AT3G49120          | Podgórska et al. 2018b [12]   |                           |
| <b>WAK1</b>  | AT1G21250          | LP: CTTCTTGTAACCACCATCGGCTT   | RP: CCCTGCTCTGAGAGTCGTT   |

[12] Podgórska, A.; Ostaszewska-Bugajska, M.; Tarnowska, A.; Burian, M.; Borysiuk, K.; Gardeström, P.; Szal, B. Nitrogen Source Dependent Changes in Central Sugar Metabolism Maintain Cell Wall Assembly in Mitochondrial Complex I-Defective Frostbite1 and Secondarily Affect Programmed Cell Death. *Int. J. Mol. Sci.* **2018**, *19*, 2206, doi:10.3390/ijms19082206.

[50] Podgórska, A.; Ostaszewska-Bugajska, M.; Borysiuk, K.; Tarnowska, A.; Jakubiak, M.; Burian, M.; Rasmusson, A.; Szal, B. Suppression of External NADPH Dehydrogenase—NDB1 in *Arabidopsis Thaliana* Confers Improved Tolerance to Ammonium Toxicity via Efficient Glutathione/Redox Metabolism. *Int. J. Mol. Sci.* **2018**, *19*, 1412, doi:10.3390/ijms19051412.

[51] Czechowski, T.; Stitt, M.; Altmann, T.; Udvardi, M.K.; Scheible, W.-R. Genome-Wide Identification and Testing of Superior Reference Genes for Transcript Normalization in *Arabidopsis*. *Plant Physiol.* **2005**, *139*, 5–17, doi:10.1104/pp.105.063743.

[55] Podgórska, A.; Burian, M.; Gieczewska, K.; Ostaszewska-Bugajska, M.; Zebrowski, J.; Solecka, D.; Szal, B. Altered Cell Wall Plasticity Can Restrict Plant Growth under Ammonium Nutrition. *Front. Plant Sci.* **2017**, *8*, 1344, doi:10.3389/fpls.2017.01344.

[S\_1] Podgórska, A.; Burian, M.; Rychter, A.M.; Rasmusson, A.G.; Szal, B. Short-Term Ammonium Supply Induces Cellular Defence to Prevent Oxidative Stress in *Arabidopsis* Leaves. *Physiol. Plant.* **2017**, *160*, 65–83, doi:10.1111/ppl.12538.
