# Supplementary material for: Respiratory Burst Oxidase Homolog D as a Modulating Component of Oxidative Response under Ammonium Toxicity
Source: MDPI journal article supplement (doi:10.3390/antiox11040703), 2022-04-02
Supplement: s1 [file s1]

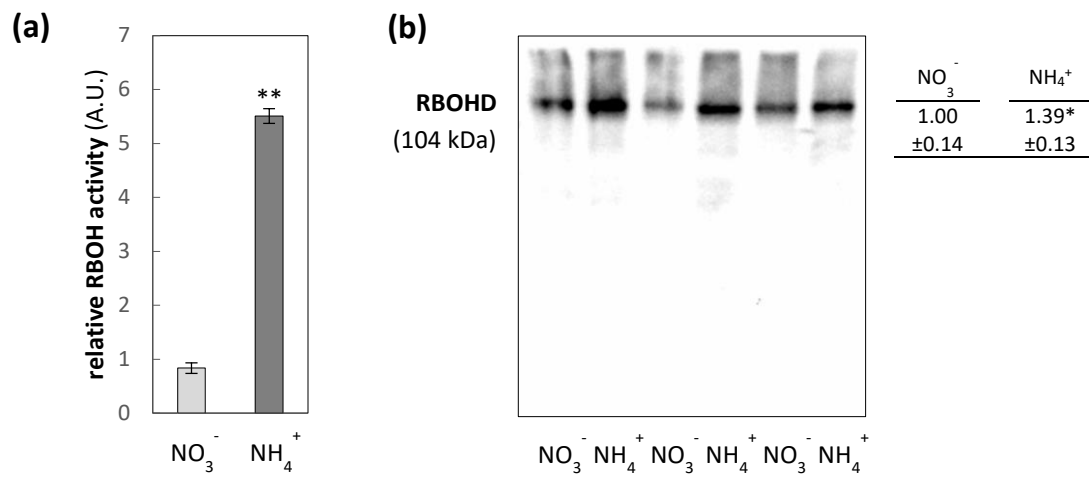

**Supplementary Figure S1.** RBOH activity and protein level in 8-week-old WT plants grown in hydroponic medium containing nitrogen in the form of nitrate or ammonium ions. (a) Relative activity of RBOH measured as DPI-sensitive superoxide production. (b) The protein level of RBOHD in plasma membranes. A whole blot is shown, including three biological replicates. Statistical differences calculated using one-way analysis of variance (ANOVA) with Tukey's posthoc test are indicated at p-value  $\leq 0.01$  (double asterisks, \*\*) and p-value  $\leq 0.05$  (single asterisk, \*).

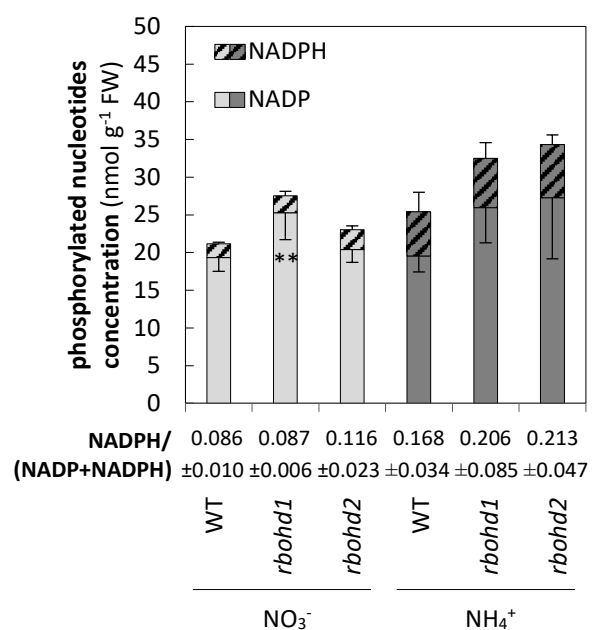

**Supplementary Figure S2.** Phosphorylated nucleotides concentration in leaves. Statistical differences calculated using one-way analysis of variance (ANOVA) with Tukey's posthoc test are indicated at p-value  $\leq 0.01$  \*\*.

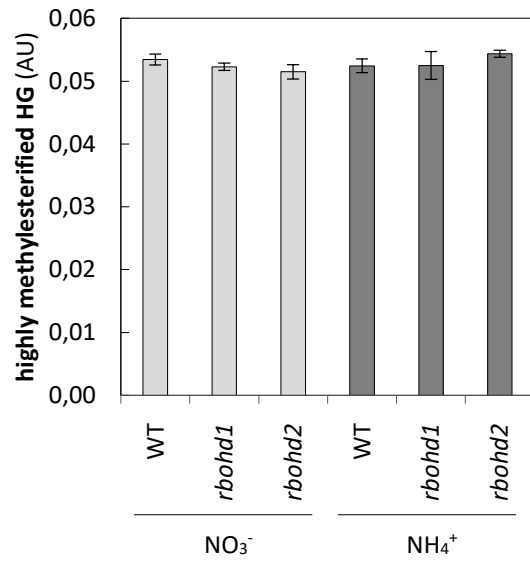

**Supplementary Figure S3.** The level of pectic highly methyl esterified homogalacturonan estimated using indirect enzyme-linked immunosorbent assay method. Comparison tests between *rboh1* and WT plants are performed on the mean experimental conditions for the nitrate (light grey) or ammonium (dark grey) growth regime separately.
